# Supplementary material
Source: publisher site journal article supplement (https://www.dovepress.com/article/259055)
Supplement: Supplementary file 1 [file get_supplementary_file.php]

## Supplementary Figures

### Diagnostic and predictive values of $^{18}\text{F}$ -FDG PET/CT metabolic parameters in *EGFR*-mutated advanced lung adenocarcinoma

(A)

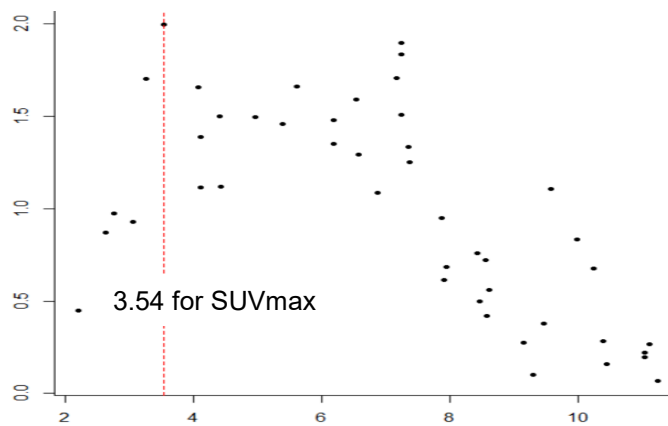

(B)

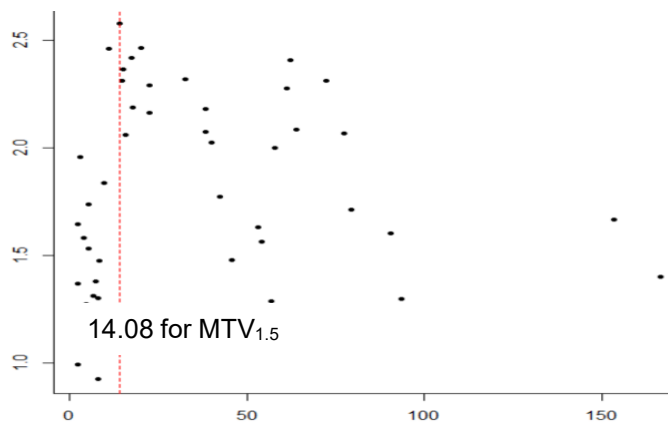

(C)

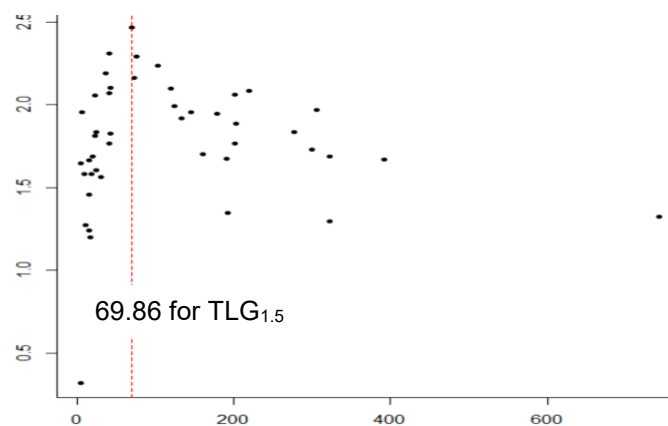

(D)

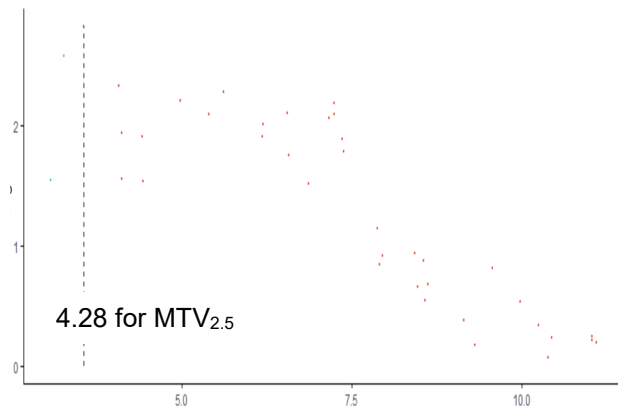

(E)

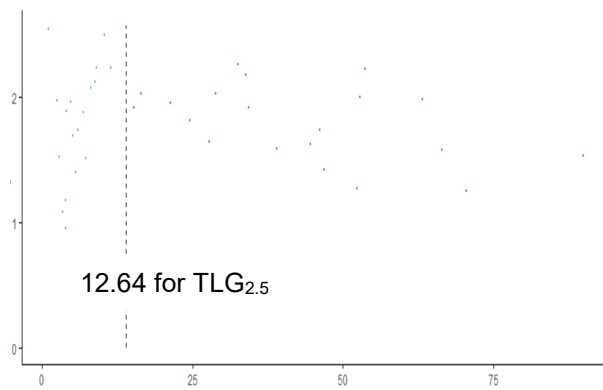

**Figure S1.** Log rank test results for progression-free survival to determine the optimal cutoff values of metabolic parameters. The optimal cutoffs were determined at 3.54 for SUV max (A), 14.08 for MTV<sub>1.5</sub> (B), 69.86 for TLG<sub>1.5</sub> (C), 4.28 for MTV<sub>2.5</sub> (D), and 12.64 for TLG<sub>2.5</sub> (E), respectively.
